# Supplementary material for: Guanine crystal formation by bacteria
Source: PubMed Central journal article supplement (PMC10071637; doi:10.1186/s12915-023-01572-8), 2023-04-03
Supplement: 12915_2023_1572_MOESM2_ESM.pdf [file 12915_2023_1572_MOESM2_ESM.pdf]

## Supplementary Information for

### Guanine crystal formation by bacteria

María Elisa Pavan, Federico Movilla, Esteban E. Pavan, Florencia Di Salvo, Nancy I. López, M.

Julia Pettinari

#### Additional file 2

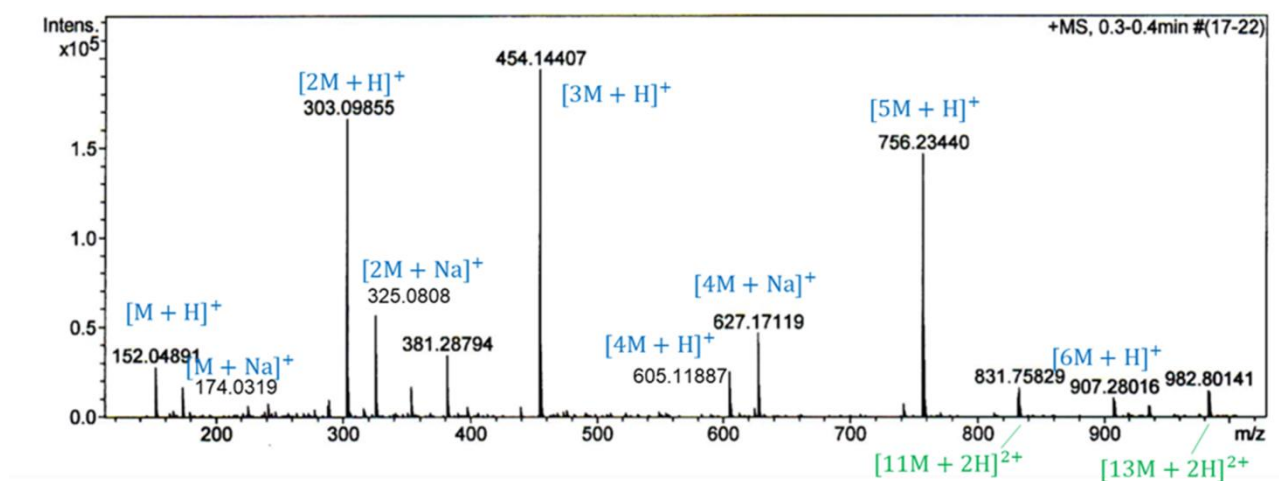

**Fig. S3. ESI-MS experimental results for guanine produced by 34mel.** The spectrum shows guanine association in solution. Solvent: methanol: DMSO 80:20.

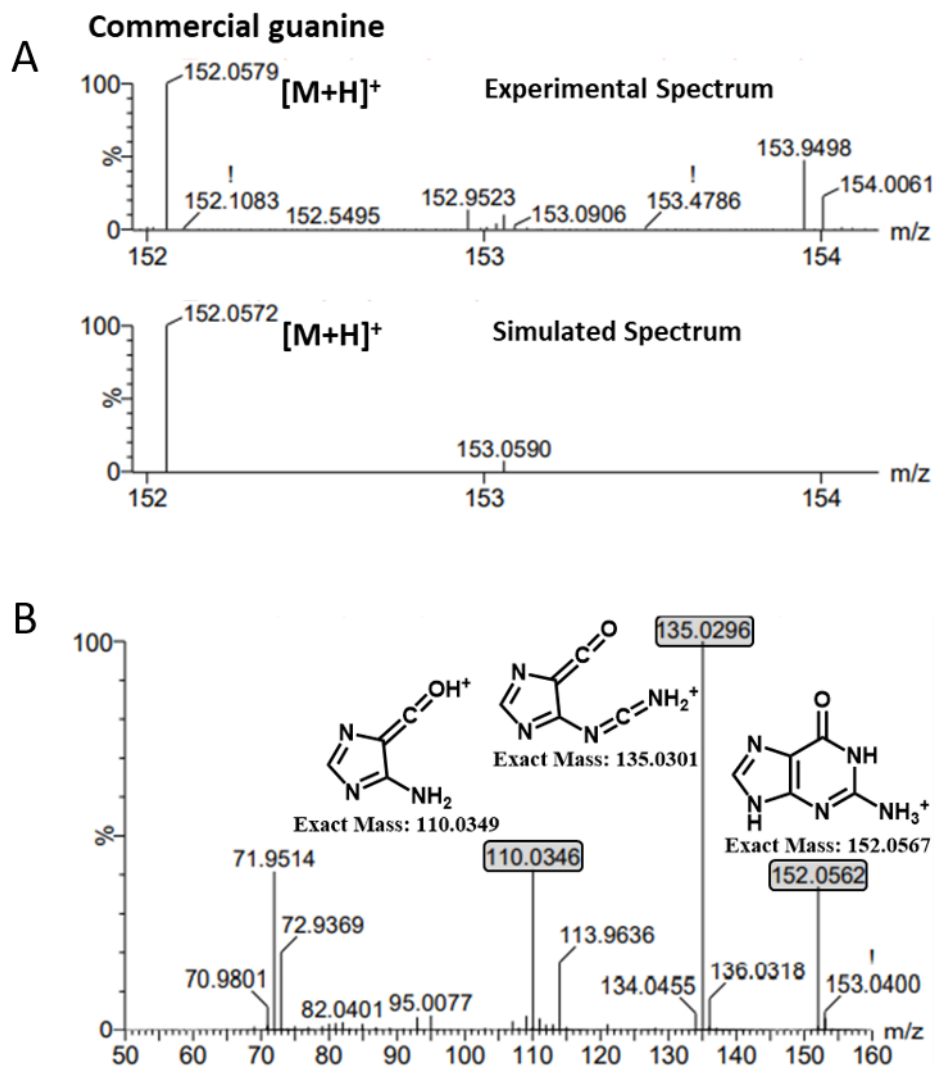

**Fig. S4. ESI-MS and MS/MS experiments for commercial guanine. A** ESI-MS experimental result compared with the simulated spectrum;  $[M+H]^+$  ion ( $m/z$  152.0579) is indicated. **B** MS/MS experimental results using  $[M+H]^+$  ion ( $m/z$  152.0579) as the parent ion. Solvent: methanol:  $H_2O$ .

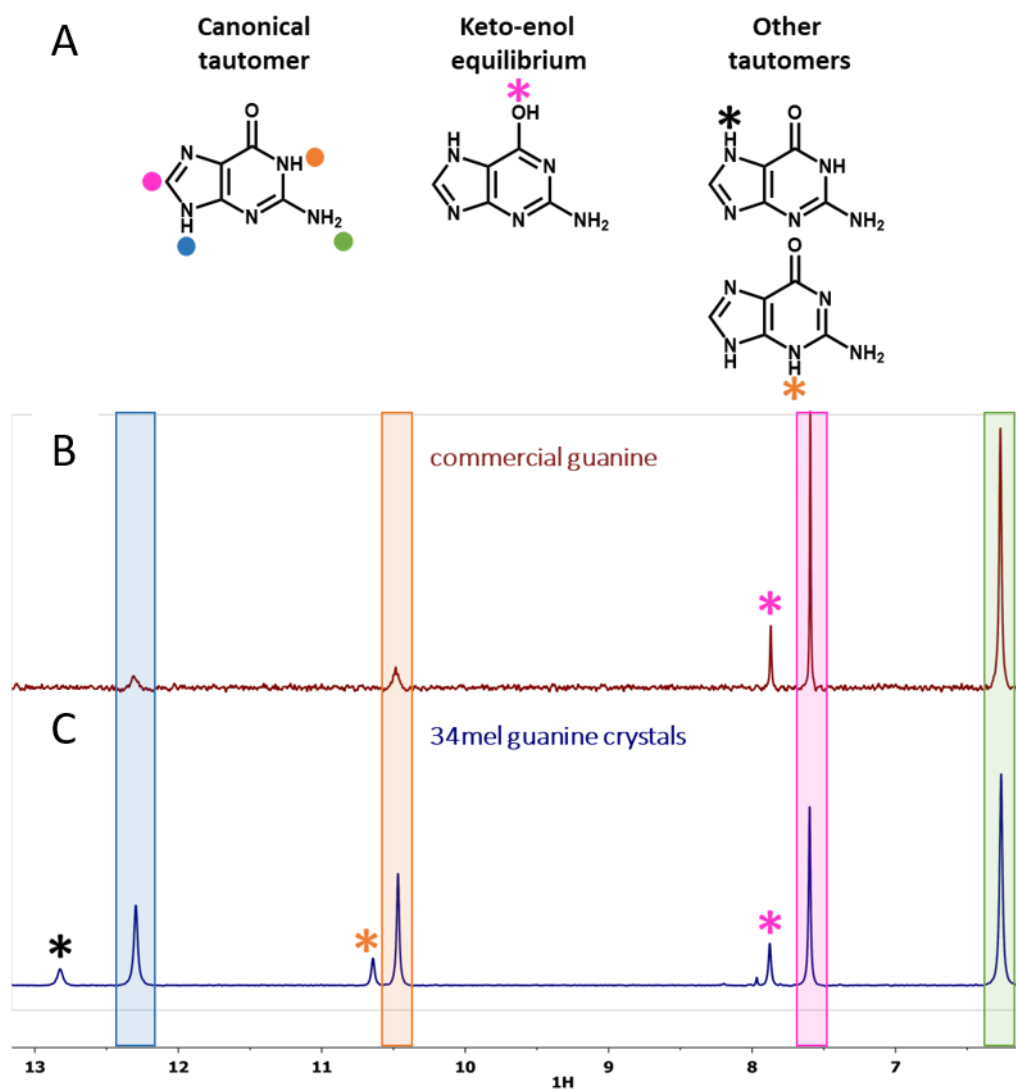

**Fig. S5.  $^1\text{H-NMR}$  characterization of 34mel crystals.** **A** Scheme of some of the expected tautomeric forms of guanine. **B-C**  $^1\text{H-NMR}$  spectra for commercial guanine (**B**) and guanine crystals produced by 34mel (**C**). In color, signal assignment for guanine hydrogens and proposed signal assignment that may be produced from tautomers in solution.

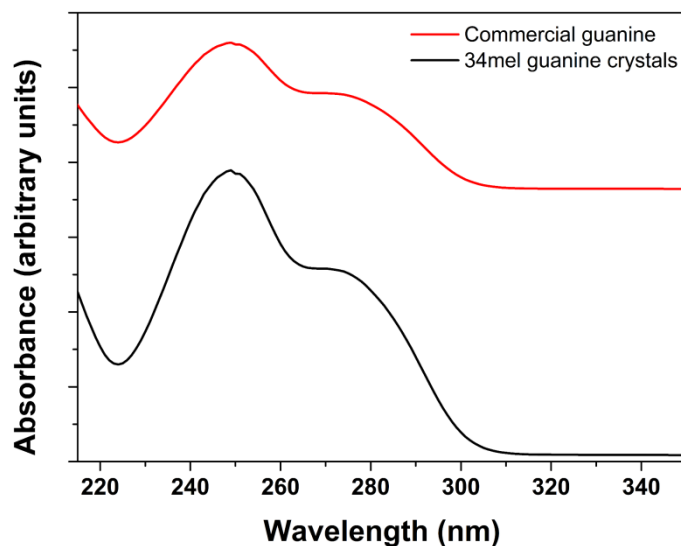

**Fig. S6. UV-vis spectra for commercial and 34mel guanine in acid solution.**

**Additional data 1. Elemental analysis of crystals purified from 34mel.**

The presence of biogenic melanin and water molecules were taken into account in the calculated values of C% H% and N% for the guanine samples. Biogenic melanin was represented using a pyromelanin monomer which corresponds to a homogentisic acid unit with two hydrogen atoms removed  $[(C_8H_4O_4)_n]$ . A good agreement was obtained when considering 6% of the monomer and 14% of water  $[(C_5H_5N_5O)_{15}(C_8H_4O_4) \cdot 22H_2O]$ .
