# Supplementary material for: Guanine crystal formation by bacteria
Source: PubMed Central journal article supplement (PMC10071637; doi:10.1186/s12915-023-01572-8), 2023-04-03
Supplement: 12915_2023_1572_MOESM4_ESM.pdf [file 12915_2023_1572_MOESM4_ESM.pdf]

## Supplementary Information for Guanine crystal formation by bacteria

María Elisa Pavan, Federico Movilla, Esteban E. Pavan, Florencia Di Salvo, Nancy I. López, M. Julia Pettinari

### Additional file 4

**Table S3.** Bacteria used for genome analysis

| Species                                                                        | GenBank Accession    |
|--------------------------------------------------------------------------------|----------------------|
| <i>Aeromonas allosaccharophila</i> CECT 4199 <sup>T</sup>                      | NZ_CDBR00000000      |
| <i>Aeromonas aquatica</i> AE235 <sup>T</sup>                                   | NZ_JRGL01000000      |
| <i>Aeromonas australiensis</i> CECT 8023 <sup>T</sup>                          | NZ_CDDH00000000      |
| <i>Aeromonas bestiarum</i> CECT 4227 <sup>T</sup>                              | NZ_CDDA00000000      |
| <i>Aeromonas bivalvium</i> CECT 7113 <sup>T</sup>                              | NZ_CDBT00000000      |
| <i>Aeromonas caviae</i> CECT 838 <sup>T</sup>                                  | NZ_JAGDEN000000000.1 |
| <i>Aeromonas dhakensis</i> AAK1                                                | NZ_BAFL00000000      |
| <i>Aeromonas diversa</i> CECT 4254 <sup>T</sup>                                | NZ_CDCE00000000.1    |
| <i>Aeromonas encheleia</i> CECT 4342 <sup>T</sup>                              | NZ_CDDI00000000      |
| <i>Aeromonas enteropelogenes</i> CECT 4255 <sup>T</sup>                        | NZ_CDDE00000000      |
| <i>Aeromonas eucrenophila</i> CECT 4224 <sup>T</sup>                           | NZ_CDDF00000000      |
| <i>Aeromonas finlandiensis</i> 4287D <sup>T</sup>                              | NZ_JR GK00000000     |
| <i>Aeromonas fluvialis</i> LMG 24681 <sup>T</sup>                              | NZ_CDBO00000000      |
| <i>Aeromonas hydrophila</i> ATCC 7966 <sup>T</sup>                             | NC_008570            |
| <i>Aeromonas jandaei</i> CECT 4228 <sup>T</sup>                                | NZ_CDBV00000000      |
| <i>Aeromonas lacus</i> AE122 <sup>T</sup>                                      | NZ_JRGM00000000      |
| <i>Aeromonas media</i> CECT 4232 <sup>T</sup>                                  | NZ_CDBZ00000000.1    |
| <i>Aeromonas molluscorum</i> 848 <sup>T</sup>                                  | NZ_AQGQ00000000      |
| <i>Aeromonas piscicola</i> LMG 24783 <sup>T</sup>                              | NZ_CDBL00000000      |
| <i>Aeromonas popoffii</i> CIP 105493 <sup>T</sup>                              | NZ_CDBI00000000      |
| <i>Aeromonas rivipollensis</i> KN-Mc-11N1                                      | NZ_CP027856.1        |
| <i>Aeromonas rivuli</i> DSM 22539 <sup>T</sup>                                 | NZ_CDBJ00000000      |
| <i>Aeromonas salmonicida</i> subsp. <i>achromogenes</i> AS03                   | NZ_AMQG00000000.2    |
| <i>Aeromonas salmonicida</i> subsp. <i>masoucida</i> NBRC 13784 <sup>T</sup>   | NZ_BAWQ00000000.1    |
| <i>Aeromonas salmonicida</i> subsp. <i>pectinolytica</i> 34meI <sup>T</sup>    | ARYZ00000000.2       |
| <i>Aeromonas salmonicida</i> subsp. <i>salmonicida</i> ATCC 33658 <sup>T</sup> | NZ_CDDW00000000.1    |
| <i>Aeromonas salmonicida</i> subsp. <i>smithia</i> JF4097                      | NZ_JZTI00000000.1    |
| <i>Aeromonas sanarellii</i> LMG 24682 <sup>T</sup>                             | NZ_CDBN00000000      |
| <i>Aeromonas schubertii</i> WL1483                                             | NZ_CP013067          |
| <i>Aeromonas simiae</i> CIP 107798 <sup>T</sup>                                | NZ_CDBY00000000      |
| <i>Aeromonas sobria</i> CECT 4245 <sup>T</sup>                                 | CDBW00000000         |
| <i>Aeromonas taiwanensis</i> LMG 24683 <sup>T</sup>                            | NZ_BAWK00000000      |
| <i>Aeromonas tecta</i> CECT 7082 <sup>T</sup>                                  | NZ_CDCA00000000      |
| <i>Aeromonas veronii</i> B565                                                  | NC_015424            |

|                                                |                |
|------------------------------------------------|----------------|
| <i>Escherichia coli</i> K-12 substr. BW25113   | NZ_CP009273.1  |
| <i>Pseudomonas aeruginosa</i> PAO1             | NC_002516.2    |
| <i>Pseudomonas extremaustralis</i> DSM 25547   | AHIP00000000.1 |
| <i>Pseudomonas protegens</i> Pf-5              | CP000076.1     |
| <i>Pseudomonas putida</i> KT2440               | NC_002947.4    |
| <i>Pseudomonas syringae</i> B728a              | NC_007005.1    |
| <i>Shewanella oneidensis</i> MR-1 <sup>T</sup> | NC_004347.2    |
